# Supplementary material for: Onion-like carbon matrix supported Co3O4 nanocomposites: a highly reversible anode material for lithium ion batteries with excellent cycling stability
Source: Royal Society of Chemistry journal article supplement (doi:10.1039/c3ta10559h), 2013-01-01
Supplement: c3ta10559h.pdf [file c3ta10559h.pdf]

## **Supporting Information**

### **Onion-like Carbon Matrix Supported Co<sub>3</sub>O<sub>4</sub> Nanocomposites: a Highly Reversible Anode Material for Lithium Ion Batteries with Excellent Cycling Stability**

Ye Wang,<sup>a</sup> Fei Yan,<sup>b</sup> Shuwei Liu,<sup>b</sup> Alex Yuan Sheng Tan,<sup>a</sup> Xiao Wei Sun,<sup>b,c</sup> Hui Ying Yang<sup>a\*</sup>

<sup>a</sup> Pillar of Engineering Product Development, Singapore University of Technology and Design, 20 Dover Drive, 138682, Singapore

<sup>b</sup> School of Electrical and Electronic Engineering, Nanyang Technological University, 639798, Singapore

<sup>c</sup> South University of Science and Technology, 1088 Xue-Yuan Road, Shenzhen, Guangdong 518055, China

\*Email: yanghuiying@sutd.edu.sg

## Supporting Figures

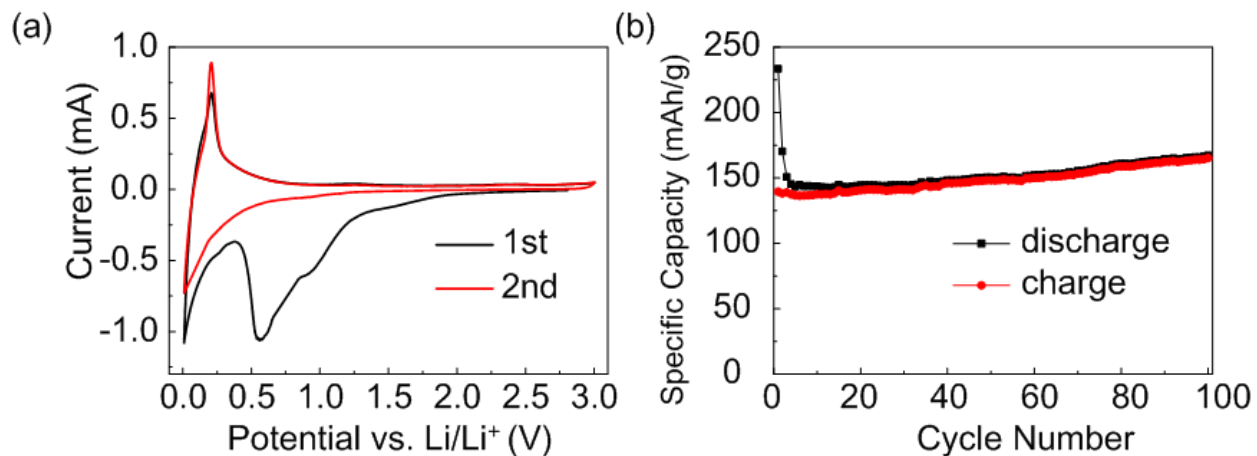

Fig. S1. Electrochemical performance of the pure OLC electrode: (a) cyclic voltammetry curves in the first two cycles at a scan rate of  $0.1 \text{ mV s}^{-1}$  in a potential range of  $0.01 - 3 \text{ V}$  versus  $\text{Li/Li}^+$ , and (b) cyclic performance at a current density of  $200 \text{ mA g}^{-1}$ .
